# Genome-wide characterization of the common bean kinome: catalog and insights into expression patterns and genetic organization

Alexandre Hild Aono<sup>a</sup>, Ricardo José Gonzaga Pimenta<sup>a</sup>, Caroline Marcela da Silva Dambroz<sup>b</sup>, Francisco Cleilson Lopes Costa<sup>b</sup>, Reginaldo Massanobu Kuroshu<sup>c</sup>, Anete Pereira de Souza<sup>a,d,\*</sup>, Welison Andrade Pereira<sup>b,\*</sup>

<sup>a</sup> *Molecular Biology and Genetic Engineering Center (CBMEG), University of Campinas (UNICAMP), Campinas, Brazil*

<sup>b</sup> *Department of Biology, Federal University of Lavras (UFLA), Lavras, Brazil*

<sup>c</sup> *Instituto de Ciência e Tecnologia, Universidade Federal de São Paulo (UNIFESP), São José dos Campos, Brazil*

<sup>d</sup> *Department of Plant Biology, Biology Institute, University of Campinas (UNICAMP), Campinas, Brazil*

---

\*Corresponding author

*Email addresses:* [alexandre.aono@gmail.com](mailto:alexandre.aono@gmail.com) (Alexandre Hild Aono), [ricardojpgpimenta@gmail.com](mailto:ricardojpgpimenta@gmail.com) (Ricardo José Gonzaga Pimenta), [caroline.silva3@estudante.ufla.br](mailto:caroline.silva3@estudante.ufla.br) (Caroline Marcela da Silva Dambroz), [cleilson.costa@estudante.ufla.br](mailto:cleilson.costa@estudante.ufla.br) (Francisco Cleilson Lopes Costa), [rmkuroshu@unifesp.br](mailto:rmkuroshu@unifesp.br) (Reginaldo Massanobu Kuroshu), [anete@unicamp.br](mailto:anete@unicamp.br) (Anete Pereira de Souza), [welison.pereira@ufla.br](mailto:welison.pereira@ufla.br) (Welison Andrade Pereira)

## Abstract

The protein kinase (PK) superfamily is one of the largest superfamilies in plants and is the core regulator of cellular signaling. Even considering this substantial importance, the kinome of common bean (*Phaseolus vulgaris*) has not been profiled yet. Here, we identified and characterised the complete set of kinases of common bean, performing an in-depth investigation with phylogenetic analyses and measurements of gene distribution, structural organization, protein properties, and expression patterns over a large set of RNA-Sequencing data. Being composed of 1,203 PKs distributed across all *P. vulgaris* chromosomes, this set represents 3.25% of all predicted proteins for the species. These PKs could be classified into 20 groups and 119 subfamilies, with a more pronounced abundance of subfamilies belonging to the receptor-like kinase (RLK)-Pelle group. In addition to provide a vast and rich reservoir of data, our study supplied insights into the compositional similarities between PK subfamilies, their evolutionary divergences, highly variable functional profile, structural diversity, and expression patterns, modeled with coexpression networks for investigating putative interactions associated with stress response.

*Keywords:* coexpression networks, duplication events, gene expression, kinase gene family, *Phaseolus vulgaris*, phylogenetic analyses

## 1. Introduction

A kinome can be defined as an organism complete set of proteins that contain a kinase domain, which are denominated protein kinases (PKs). The kinase domain is characterized by a catalytic core consisting of 250 to 300 conserved amino acids with substrate specificity (Lehti-Shiu & Shiu, 2012; Wei et al., 2014). PKs have the ability to phosphorylate protein substrates, transferring a  $\gamma$ -phosphate residue from an ATP molecule to the hydroxyl group of a serine, threonine or tyrosine in the target protein (Hanks & Hunter, 1995; Liu et al., 2020). Through this process, PKs regulate the activity of their targets and, as a consequence, mediate diversified processes of an organism's life, from its early development to its responses to biotic or abiotic stresses (Liu et al., 2015).

PKs are part of the largest and most conserved gene superfamily in plants (Liu et al., 2015), piquing the interest of researchers seeking to elucidate crucial mechanisms of plant vegetative and reproductive development, in addition to their responses to the environment. According to Lehti-Shiu & Shiu (2012), PKs from various plant species can be identified and classified into 115 families organized into several groups, including receptor-like kinase (RLK)-Pelle; cGMP-dependent protein kinase, and lipid signaling kinase families (AGC); calcium- and calmodulin-regulated kinase (CAMK); casein kinase 1 (CK1); cyclin-dependent kinase, mitogen-activated protein kinase, glycogen synthase kinase, and cyclin-dependent kinase-like kinase (CMGC); cyclic AMP-dependent protein kinase (cAPK); serine/threonine kinase (STE); and tyrosine kinase-like kinase (TKL). In fact, the functional classification of PKs based on the conservation and phylogeny of their catalytic domains enabled the first studies on these proteins (Liu et al., 2015). The first plant PK was isolated from pea (*Pisum sativum*) in 1973 (Keates, 1973), and the first plant PK DNA sequences were identified in common bean (*Phaseolus vulgaris*) and rice (*Oryza sativa*) using degenerate primers in 1989 (Lawton et al., 1989). Since then, the study of kinomes of different plant species at a genome-wide scale has been possible with the advancement of high-throughput sequencing technologies Liu et al. (2015).

Several studies have shown that plant kinomes are much larger than those of other eukaryotes (Liu et al., 2015). For instance, the human genome has 518 predicted kinases (Manning et al., 2002), while plant species have between 600 to 2,500 members (Lehti-Shiu & Shiu, 2012). This

30 expansion in the repertoire of plant PKs can be attributed to frequent recent whole genome  
31 duplication (WGD) events associated with high rates of gene retention (Lehti-Shiu & Shiu,  
32 2012). The increase in the complexity of a species can be associated with the expansion in  
33 the complexity of its proteins – which helps to explain the large variation in the number  
34 and diversity of PKs in different species. The study of kinomes demonstrates, based on PK  
35 representativeness, the relevance of this protein superfamily for the physiology of a species. As  
36 an illustration, 954 PKs were found in *Fragaria vesca* (Liu et al., 2020), 1,168 PKs in *Vitis*  
37 *vinifera* (Zhu et al., 2018b), 758 PKs in *Ananas comosus* (Zhu et al., 2018a), 2,168 PKs in  
38 *Glycine max* (Liu et al., 2015), 1,436 PKs in *Solanum lycopersicum* (Singh et al., 2014), 1,241  
39 PKs in *Zea mays* (Wei et al., 2014), and 942 PKs in *Arabidopsis thaliana* (Zulawski et al.,  
40 2014).

41 Among the species of major interest in agriculture, the common bean (*P. vulgaris* L.)  
42 stands out with its fundamental importance for human consumption. Its grains are a source of  
43 protein, lysine, fiber (Messina, 2014), folate, and mineral salts, such as iron, zinc, magnesium  
44 and potassium (Mitchell et al., 2009). Additionally, they present resistant starch (Hutchins  
45 et al., 2012) and phenolic compounds with antioxidant potential (Marathe et al., 2011). Among  
46 many health benefits, beans act positively on cholesterol levels (Gunnness & Gidley, 2010), blood  
47 glucose, inflammatory processes, metabolic syndrome and cardiovascular diseases (Messina,  
48 2014). Given these attributes, bean production arises as a strategic action for agriculture,  
49 which justifies the maintenance of the large area destined for sowing this crop in the 2022  
50 harvest (Conab, 2022).

51 Nevertheless, bean production is affected by several types of stresses, including fungal, viral  
52 and bacterial diseases (Basavaraja et al., 2020), insect and nematode pests (Singh & Schwartz,  
53 2010), drought, and aluminium toxicity (Beebe et al., 2009). PKs have a well-established role in  
54 the response to both biotic and abiotic stresses, being part of highly complex signaling cascades  
55 (Ben Rejeb et al., 2014; Ye et al., 2017). Importantly, PK genes have been identified as the  
56 source of resistance to anthracnose, a devastating disease that can lead to yield losses of up  
57 to 100% in *P. vulgaris* (Pvu) (Melotto & Kelly, 2001; Oblessuc et al., 2015; Richard et al.,  
58 2021). Additional evidence of associations of these proteins with resistance to other diseases in

59 common bean (Cooper et al., 2020; Vasconcellos et al., 2017) further highlight the importance  
60 of their characterization in this crop.

61 Given the potential of PKs for the development of plants and their interaction with the  
62 environment, it is essential that this superfamily is thoroughly described and analysed to enable  
63 biochemical and molecular inferences about various aspects of plant-environment interactions.  
64 Despite the availability of the common bean genome since 2014 (Schmutz et al., 2014), the  
65 kinome of Pvu has not yet been investigated. The aim of this study, therefore, was to identify,  
66 classify and catalogue the complete set of PKs of this species. Furthermore, phylogenetic  
67 analyses and predictions of chromosomal location and structural organization of genes encoding  
68 PKs were performed. Lastly, PK subfamilies had their gene expression estimated with a large  
69 set of RNA-Seq data, and genic interactions were modeled using coexpression networks.

## 70 **2. Material and methods**

### 71 *2.1. Genome-wide kinase identification and phylogenetic analyses*

72 Pvu gene, coding DNA, and protein-coding gene sequences were retrieved from the Pvu  
73 genome (v2.1) in Phytozome v.13 (Goodstein et al., 2012). For protein kinase (PK) identifi-  
74 cation, we selected hidden Markov models (HMMs) of typical kinase families from the Pfam  
75 database (El-Gebali et al., 2019): Pkinase (PH00069) and Pkinase\_Tyr (PF07714). All Pvu  
76 protein sequences were aligned against kinase HMMs using HMMER v.3.3 (Finn et al., 2011)  
77 with an E-value cut-off of 0.1 and a minimum domain coverage of 50% (Lehti-Shiu & Shiu,  
78 2012). For genes with isoforms, only the longest variant was retained for further analyses.

79 Putative Pvu PKs were classified into subfamilies based on HMMs calculated with sequences  
80 from other 25 plant species (Lehti-Shiu & Shiu, 2012): *Aquilegia coerulea* (Aco), *Arabidopsis*  
81 *lyrata* (Aly), *Arabidopsis thaliana* (Ath), *Brachypodium distachyon* (Bdi), *Carica papaya* (Cpa),  
82 *Citrus clementina* (Ccl), *Citrus sinensis* (Csi), *Chlamydomonas reinhardtii* (Cre), *Cucumis*  
83 *sativus* (Csa), *Eucalyptus grandis* (Egr), *Glycine max* (Gma), *Manihot esculenta* (Mes), *Med-*  
84 *icago truncatula* (Mtr), *Mimulus guttatus* (Mgu), *O. sativa* (Osa), *Populus trichocarpa* (Ptr),  
85 *Prunus persica* (Ppe), *Physcomitrella patens* (Ppa), *Ricinus communis* (Rco), *Selaginella moel-*  
86 *lendorffii* (Smo), *Setaria italica* (Sit), *Sorghum bicolor* (Sbi), *Vitis vinifera* (Vvi), *Volvox carteri*

87 (Vca) and *Zea mays* (Zma).

88 To confirm the PKs' subfamily classification, kinase domains from the set of identified PKs  
89 were aligned with Muscle v.3.8.31 (Edgar, 2004) and used for constructing a phylogenetic tree  
90 (1,000 bootstraps) with FastTreeMP v2.1.10 (Price et al., 2010) via CIPRES gateway (Miller  
91 et al., 2011). The generated tree visualization was assessed with the ggtree (Yu et al., 2017)  
92 and ggplot2 (Villanueva & Chen, 2019) packages on R statistical software (R Core Team, 2013).

### 93 *2.2. Kinase characterization*

94 The chromosomal location of Pvu PK genes was determined using the GFF file obtained  
95 from Phytozome, and visualized with MapChart v2.2 software (Voorrips, 2002). With this same  
96 file, we also estimated the gene organization of PK subfamilies through intron numbers. Several  
97 protein properties were evaluated for the Pvu kinome. The domain composition of PKs was  
98 characterized using the Pfam database and the HMMER web server (Finn et al., 2011); their  
99 subcellular localizations were predicted with the programs WoLF PSORT (Horton et al., 2007),  
100 CELLO v.2.5 (Yu et al., 2006) and LOCALIZER v.1.0.4 (Sperschneider et al., 2017). Trans-  
101 membrane domains and N-terminal signal peptides were recognized with TMHMM v.2.0 Server  
102 (Krogh et al., 2001) and SignalP v.4.1 Server (Armenteros et al., 2019) respectively; and theo-  
103 retical isoelectric points (pIs) and molecular weights predicted with the ExPASy server (Artimo  
104 et al., 2012). These properties were summarized with descriptive statistics and different plots  
105 constructed with the R statistical software (R Core Team, 2013). The functional annotation of  
106 the Pvu kinome was performed with the Blast2GO tool (Conesa & Götzt, 2008) together with  
107 SWISS-PROT (Bairoch & Apweiler, 2000) and Uniprot (Consortium, 2019) databases. From  
108 the PK annotations, Gene Ontology (GO) terms (Ashburner et al., 2000) were retrieved and  
109 analysed via treemaps constructed using the REViGO tool (Supek et al., 2011).

### 110 *2.3. Duplication events*

111 The Multiple Collinearity Scan (MCScanX) toolkit (Wang et al., 2012) was used for iden-  
112 tifying putative homologous PKs along the Pvu genome and categorizing duplication events,  
113 which were separated into tandem and segmental duplications and visualized using MapChart  
114 v2.2 (Voorrips, 2002) and Circos (Krzywinski et al., 2009) softwares, respectively. We also used

115 MCSanX for calculating synonymous (Ks) and non-synonymous substitution (Ka) rates, and  
116 with Ks estimations, we calculated the date of duplication events using the formula  $T = K_s/2\lambda$ ,  
117 with  $\lambda$  representing the mean value of clock-like Ks rates ( $6.5 \times 10^{-9}$ ) (Gaut et al., 1996).

#### 118 *2.4. RNA-Seq experiments and co-expression network modelling*

119 PKs' expression quantifications were assessed using RNA-Seq experiments detailed in Sup-  
120 plementary Table S1 and obtained from NCBI's Sequence Read Archive (SRA) (Leinonen et al.,  
121 2010). We selected datasets containing samples from different bean genotypes (Negro Jamapa,  
122 SA118, SA36, Black Turtle Soup, G19833, Ispir, DOR364 and IAC-Imperador) and analysed  
123 in different tissues (leaves, stems, shoots, flowers, pods, seeds and nodules) (Hiz et al., 2014;  
124 Kamfwa et al., 2017; Khankhum et al., 2016; Lu et al., 2019; O'Rourke et al., 2014; Silva et al.,  
125 2019). RNA-Seq reads were downloaded and their quality assessed with FastQC software (An-  
126 drews, 2010). Using Trimmomatic v.0.39 (Bolger et al., 2014), we only retained reads with  
127 a minimum Phred score of 20 and larger than 30 bp, which were used for PK quantification  
128 using bean transcript sequences downloaded from Phytozome and the Salmon v.1.1.0 software  
129 (Patro et al., 2017) (k-mer of 17). All PK expression counts were normalized using transcripts  
130 per million (TPM) values. PK subfamilies' expression was evaluated using a heatmap repre-  
131 sentation with the pheatmap R package (Kolde & Kolde, 2015), considering averaged TPM  
132 values and a complete-linkage hierarchical method with euclidean distances. Pairwise correla-  
133 tions between kinase subfamilies were calculated with Pearson correlation coefficients and used  
134 for modeling co-expression networks via igraph R package (Csardi et al., 2006). Each node in  
135 such a structure represents a kinase subfamily, and an edge a minimum correlation coefficient  
136 of 0.6. We created two different networks, separating RNA samples according to control and  
137 adverse experimental conditions. These networks were evaluated and compared considering:  
138 (i) their community structures assessed with a propagating label algorithm (Raghavan et al.,  
139 2007); (ii) hub scores calculated with Kleinberg's hub centrality (Kleinberg, 1999); and (iii)  
140 edge betweenness measured with the number of geodesics passing through an edge (Brandes,  
141 2001).

## 142 3. Results

### 143 3.1. Genome-wide identification and classification of common bean kinases

144 All the 36,995 annotated proteins for the Pvu genome (v.2.1) were downloaded and scanned  
145 for the presence of putative kinase domains, as per the typical HMMs of the kinase domains  
146 (PF00069 and/or PF07714). In this first step, 1,800 proteins were found with significant align-  
147 ments against these domains. From this set of alignments, 541 proteins were discarded for  
148 representing isoforms and 56 for not having a coverage of at least 50% of the corresponding  
149 kinase domain. These 56 sequences are likely related to atypical kinases or pseudogenes (Lehti-  
150 Shiu & Shiu, 2012; Liu et al., 2015). Out of the remaining 1,203 putative kinases, 775 returned  
151 from search criteria of PF00069, and 440 from search criteria of PF07714, with 6 PKs showing  
152 both domains (Supplementary Table S2).

153 The 1,203 PKs found were classified into 20 groups and 119 subfamilies through comparative  
154 alignments using HMMER and HMMs constructed with sequences from subfamilies of 25 other  
155 plant species (Lehti-Shiu & Shiu, 2012). In total, 1,197 PKs were confirmed by phylogeny  
156 (Supplementary Figs. S1-2; Supplementary Table S3). The group with the highest quantity of  
157 PKs was RLK-Pelle (~70% of the amount of PKs), followed by CAMK (~7%), CMGC (~6%),  
158 TKL (~5%), and STE (~4%). Among the predicted kinases, six were considered to belong to  
159 an additional group called 'Unknown', which may represent specific subfamilies of Pvu. The  
160 distribution of PKs per subfamily had a mean of ~10 (Supplementary Table S4) with a high  
161 dispersion (standard deviation of ~17), caused by the presence of a few very large subfamilies.  
162 Among the RLK group, the RLK-Pelle\_DLSV subfamily stood out as the most numerous (140),  
163 representing 11.6% of the total PKs of the species. In fact, the RLK-Pelle\_DLSV subfamily was  
164 also the most numerous one in almost all 26 species analyzed, except in Smo (Supplementary  
165 Fig. S3). The closest species to Pvu regarding subfamilies' composition were Ppe, Vvi and  
166 Mtr.

### 167 3.2. Kinase gene mapping and structural characterization

168 After identifying the PKs and classifying them into families and subfamilies, the genomic  
169 annotation information was used to position each PK gene along the Pvu genome. As a



170 result, 1,191 PKs could be mapped to chromosomes, while 12 were located in scaffolds. The  
171 distribution of PKs per chromosome was extracted via GFF correspondences together with the  
172 measurement of intron counts in the related genes (Fig. 1A; Supplementary Table S5). There  
173 was not a noticeable concentration of the 1,991 PKs in any specific chromosome (Supplementary  
174 Table S6), and each of the remaining 12 PKs was located in a different scaffold. The greatest  
175 quantity of PKs was observed in chromosome 8 (172, 14.30%), and the least, in chromosome 10  
176 (65, 5.40%). Although the largest chromosome contained the highest number of annotated PKs  
177 (chromosome 8 with ~63 million base pairs (Mb) in length); the opposite was not observed in  
178 the shortest one (chromosome 6 with ~31 Mb had 101 PKs estimated, while chromosome 10  
179 had only 65 with a length of ~44 Mb).

180 We found that 163 PKs (13.5%) did not show introns in their gene structure. Most genes  
181 (835 or 69.4%) had up to 10 introns, while 182 PKs had between 11-20 introns (15.1%). For  
182 23 genes (1.9%), more than 20 introns were predicted. In our study, we found 5.74 introns  
183 per kinase on average (median of 5), and the largest quantities observed were 28 (found in a  
184 member of PEK\_GCN2 subfamily), 26 (RLK-Pelle\_LRR-XIIIb, RLK-Pelle\_LRR-XIIIb, RLK-  
185 Pelle\_LRR-XIIIb), and 24 (RLK-Pelle\_DLSV) (Supplementary Table S5).

### 186 *3.3. Protein kinase properties*

187 In order to further characterize common bean PKs, we checked for the presence of additional  
188 protein domains with the HMMER and the Pfam database (Supplementary Table S7). Of the  
189 PKs analyzed, 563 showed only kinase-like domains, while for the remaining 640, 57 additional  
190 domains were noted (Supplementary Table S8). Some of these domains have relevant anno-  
191 tations indicating important functional potentialities. The five most prominent domains were  
192 Leucine rich repeat N-terminal domain 2 (LRRNT\_2), Leucine rich repeat 8 (LRR\_8), LRR\_1,  
193 D-mannose binding lectin (B\_lectin) and S-locus glycoprotein domain.

194 The vast majority of Pvu PKs (1,167, 97%) presented only one kinase domain, while 34  
195 and two PKs contained two and three of such domains, respectively (Supplementary Table  
196 S9). These 36 PKs are distributed among 12 subfamilies. It is noteworthy that the subfamilies  
197 in which two or three kinase domains were found were, in order of abundance: AGC\_RSK-2  
198 (21), RLK-Pelle\_RLCK-XI (3), RLK-Pelle\_L-LEC (2), RLK-Pelle\_WAK\_LRK10L-1 (2), RLK-

199 Pelle\_DLSV (1), RLK-Pelle\_LRK10L-2 (1), RLK-Pelle\_LRR-VIII-1 (1), RLK-Pelle\_PERK-2  
200 (1), CMGC\_CDK-CCRK (1), CMGC\_SRPK (1), AGC\_NDR (1), and Group-PI-2 (1). Several  
201 other domains could also be found, providing increased degrees of complexity for the analyzed  
202 proteins (Supplementary Table S8). Up to 14 domains were predicted in the Phvul.005G025000.1.p  
203 protein, including the zf-RING\_UBOX, Ank\_2 and SH3\_15 domains, in addition to Pkinase. The  
204 diversity of distinct domains observed (57), as well as their combinations, is extensive.

205 We could not obtain a consistent prognosis of PK subcellular localizations by all the selected  
206 software (WoLF PSORT, CELLO and LOCALIZER); therefore, we only considered predictions  
207 for PKs with a coincidence by at least two tools. Employing this approach, 697 PKs (~60%)  
208 could have their localization predicted into six categories: chloroplast, cytoplasm, extracellu-  
209 lar, mitochondria, nucleus, or membrane regions. The most prominent localizations were the  
210 membrane, cytoplasm and nucleus, to which 41.7, 24.4 and 17.5% of Pvu PKs were attributed,  
211 respectively (Supplementary Table S10; Fig. 1B).

212 The other protein properties evaluated were the pI, molecular weight, and presence of signal  
213 peptides and transmembrane helices (Supplementary Table S10; Fig. 1B). We found that ~39%  
214 of Pvu PKs had an estimated presence of signal peptides. Transmembrane helices were found  
215 in ~52.04% of PKs, separated in proteins with one (33.75%), two (17.04%), three (1.16%), and  
216 five helices (0.08%). Regarding pIs, the values found ranged from 4.42 to 9.9, with an average  
217 of 7.03 and a median of 6.56. Molecular weight values ranged from 21,379.91 to 181,740.93 kDa,  
218 illustrating the diversity of sizes of macromolecules, with 72,132.36 and 70,700.84 for mean and  
219 median, respectively.

220 We also performed a full GO annotation of Pvu PKs (Supplementary Table S11), which  
221 returned 19,061 different terms separated into biological process (~58%), molecular function  
222 (~21%) and cellular component (~22%). The top 30 terms are presented in Fig. 1B and,  
223 for an easier interpretation of the results, a treemap containing all the GO terms related to  
224 biological processes was constructed with the REViGO tool (Supplementary Fig. S4). We  
225 could observe a clear prominence of terms related to the regulation of defense response, protein  
226 autophosphorylation, and post embryonic development.

227 Regarding the structural diversity and protein properties among PKs, we could observe

228 distinct features between subfamilies (Supplementary Tables S12-S13). Although our analyses  
229 of Pvu PK genes did not reveal any clear distribution pattern in the intron quantity per kinase  
230 (Fig. 1A), it was possible to note that members of the same subfamily tended to have a  
231 similar number of predicted introns. For instance, all five members of the RLK-Pelle\_LRR-  
232 VII-1 subfamily had only one intron, and all five members of RLK-Pelle\_LRR-IV had three  
233 introns. Of the 118 subfamilies, 15 had members with the same number of introns, and for the  
234 remaining, most had a relatively conserved number of introns among their members. To get  
235 an overview of the number of introns of proteins in the same subfamily, the variance in each of  
236 them was analysed. We observed that 24 subfamilies presented only one member and, of the  
237 remaining 94 subfamilies, 15 had members with the same number of introns, i.e, with a variance  
238 equal to zero. Only six subfamilies showed variance above 10, indicating that members vary  
239 significantly in relation to the number of introns.

240 In addition to have the largest amount of PKs, we observed that RLK-Pelle\_DLSV pre-  
241 sented the most diverse set of domains (10 additional domains) and also the highest quantity of  
242 signal peptides, indicating a significant diversity of this family. Regarding the quantity of do-  
243 mains found in PKs, RLK-Pelle\_LRR-III and RLK-Pelle\_LRR-VII-1 followed RLK-Pelle\_DLSV,  
244 presenting 5 and 4 additional domains respectively (Supplementary Table S13). The high-  
245 est pI mean was observed in CK1\_CK1 subfamily (9.61), followed by Group-P1-4 (9.52) and  
246 RLK-Pelle\_RLCK-IV (9.43). Interestingly, CMGC\_P1-Tthe subfamily presented the maximum  
247 molecular weight predicted with only one member.

### 248 *3.4. Duplication analysis*

249 From the investigation of PK origins through duplication events, we could find estimates  
250 for 1,167 PKs corresponding to 97% of the total kinome (Supplementary Table S14). The  
251 prominent origin was caused by WGD or segmental duplications with 839 PKs, followed by  
252 tandem (191), dispersed (92), and proximal (42) duplications. 3 PKs were singleton. Regard-  
253 ing collinearity events, Ka/Ks ratios ranged from 0.046 to 4.574, with an average of 0.397  
254 (Supplementary Table S15; Supplementary Fig. S5). This ratio is used to estimate the bal-  
255 ance between neutral mutations, purifying selection and beneficial mutations on a set of genes  
256 encoding homologous proteins. The calculation is based on the ratio between the number

257 of non-synonymous substitutions per non-synonymous site in a given period of time and the  
258 number of synonymous substitutions per synonymous site, in the same period. In short, val-  
259 ues above 1 for this equation are evidence of advantageous mutations; values below 1 imply  
260 pressure against change; and values close to 1 correspond to neutral effects over the period.  
261 However, positive and negative changes can cancel each other out over time. As we observe  
262 through PKs, there are cases of positive selection of substitutions, but the vast majority of  
263 changes, whose average was 0.397, seems to act against selection. Based on clock-like Ks rates,  
264 we also estimated the time at which these duplications occurred – which ranged from 1.2 to  
265 229.1 million years ago (MYA) (Supplementary Table S15).

266 Tandem duplications were observed in 66 subfamilies (Supplementary Table S12), with the  
267 largest number of occurrences in members of the RLK-Pelle group (22 in RLK-Pelle\_DLSV,  
268 19 in RLK-Pelle\_LRK10L-2, 17 in RLK-Pelle\_CrRLK1L-1, 8 in RLK-Pelle\_LRR-III, and 7 in  
269 RLK-Pelle\_WAK\_LRK10L-1). By evaluating the distribution of GO terms in such tandemly  
270 duplicated PKs (Fig. 2A), we observed a similar profile to that observed in the total kinome  
271 (Supplementary Fig. S4), with the prominent terms related to response to stress.

### 272 *3.5. Gene expression and co-expression networks*

273 In order to measure the expression level of each of the 1,203 PKs identified in this study in  
274 a broad range of conditions, data from transcriptome studies involving several genotypes and  
275 specific designs were obtained. Initially, we estimated the TPM values associated with each  
276 PK (Supplementary Table S16), and combined such quantifications per subfamily (Supplemen-  
277 tary Table S17), averaging replicates and calculating a single value for each combination of  
278 control/non-control conditions, genotypes and tissues (Supplementary Table S18). From the  
279 heatmap constructed for the visualization of such quantifications (Fig. 3), we could observe  
280 grouping profiles according to the genotypes/tissues and experimental conditions, although  
281 with several overlays, indicating the complex expression underlying kinase subfamilies.

282 The top 5 mean expression values found were in CMGC\_RCK, CMGC\_CK2, CMGC\_GSK,  
283 AGC\_PDK1, and CK1\_CK1-P1 subfamilies (Supplementary Table S19), which also presented  
284 the highest median measures. Regarding the maximum TPM values over samples, CMGC\_RCK,  
285 CMGC\_CK2, Group-P1-4, CMGC\_GSK, and CK1\_CK1 represent the highest measures. CK1\_CK1

286 presented the 6th highest expression, and, interestingly, although Group-P1-4 did not present  
287 expressive expression values (99th highest expression), it was among the top 5 subfamilies with  
288 the largest variation of expression within samples. Other subfamilies with increased variation  
289 coefficients for the expression values within samples were Group-P1-2, ULK\_Fused, TKL-P1-8,  
290 and CAMK\_CAMK1-DCAMKL. It is noteworthy that TKL-P1-8, ULK\_Fused, and Group-P1-2  
291 presented the lowest values for mean/median expression. By taking the lowest variation coeffi-  
292 cients, the subfamilies with the most uniform expression across samples were RLK-Pelle\_RLCK-  
293 V, AGC\_RSK-2, RLK-Pelle\_LRR-IX, CAMK\_CAMKL-CHK1, and RLK-Pelle\_Extensin.

294 In order to evaluate putative associations of the subfamilies' expression with the profile of  
295 duplications and the quantity of PKs per subfamily, we performed correlations between such  
296 measures and the subfamilies' TPMs for each combination of control/non-control conditions,  
297 genotypes and tissues (Supplementary Table S20). No significant Spearman correlation coeffi-  
298 cients were found, being the largest values around 0.18, indicating that such an association is  
299 composed of joint factors which could not be easily captured by the measures evaluated.

300 Regarding the differences on the expression profile of control samples and samples under  
301 adverse conditions, we could infer an overall difference between such sets by using the heatmaps  
302 constructed (Supplementary Figs. S6-S7). However, as we employed samples from different  
303 studies, we performed a comparative analysis of such differences in terms of gene co-expression  
304 patterns rather than statistical tests (Fig. 4). In that sense, we modeled two different networks,  
305 one for control samples (Fig. 4A; Supplementary Fig. S8) and another one for samples under  
306 adverse conditions (Fig. 4C; Supplementary Fig. S9).

307 Although there was a common core structure between the networks modeled (Fig. 4B;  
308 Fig. 4B), several differences were identified. Firstly, we evaluated the presence of communities  
309 within the networks, and in contrast to a single member in the control network, the other  
310 one presented two different communities, one of them clearly separated from the main group.  
311 This indicates a more cohesive structure in the control network when compared to more sparse  
312 connections in the network affected by stress-related factors. In addition, hub and betweenness  
313 centrality measures were investigated for each one of the networks and clear distinctions could  
314 be pointed out.

315 As expected, in the control network, the hub scores for each kinase subfamily were big-  
316 ger (Supplementary Table S21), standing out the PK subfamilies CMGC\_CK2, CK1\_CK1-P1,  
317 TKL-P1-4, CMGC\_GSK, and STE\_STE20-Fray. Concerning betweenness scores, the most vul-  
318 nerable connections were those between the pairs of subfamilies CMGC\_CDK-PITSLRE/RLK-  
319 Pelle\_RLCK-X, Group-P1-4/RLK-Pelle\_RLCK-XVI, RLK-Pelle\_LRR-VII-1/RLK-Pelle\_LRR-XIIIb,  
320 and RLK-Pelle\_RLCK-XI/TKL-P1-8 (Supplementary Table S22). In the network with the  
321 samples under adverse conditions, on the other hand, more sparse hub scores were found  
322 (Supplementary Table S23), with the top 5 being CAMK\_CDPK, CK1\_CK1-P1, TKL-P1-  
323 2, TKL-P1-4, and AGC\_MAST. Regarding betweenness measures, largest values were iden-  
324 tified in this network contrasted to the control one, standing out the connections between  
325 the pairs RLK-Pelle\_LRR-IX/RLK-Pelle\_LRR-XV, RLK-Pelle\_LRR-VII-1/RLK-Pelle\_RLCK-  
326 X, AGC\_RSK-2/ULK\_ULK4, NEK/RLK-Pelle\_RLCK-X, AGC\_PKA-PKG/STE\_STE-P1 (Sup-  
327 plementary Table S24).

#### 328 4. Discussion

329 The number of PKs predicted for common bean (1,203) represents 3.25% of all predicted  
330 proteins for this species (36,995), an indicator of the importance of this superfamily. These  
331 results are similar to the percentage of PK genes in the genome of several other plants, such as  
332 3.8% in maize (Wei et al., 2014), 3.4% in *A. thaliana* (Zulawski et al., 2014), 3.7% in grapevine  
333 (Zhu et al., 2018b). These number are, however, slightly inferior to the those found for the  
334 two closest Pvu relatives with kinomes compiled: cowpea and soybean, for which 4.3 and 4.7%  
335 of proteins were predicted as PKs, respectively (Ferreira-Neto et al., 2021; Liu et al., 2015).  
336 The methodology adopted by most of the studies mentioned above was the same – a HMM  
337 approach (Lehti-Shiu & Shiu, 2012) – allowing comparative inferences to be made between  
338 them. To enable inferences and comparisons with kinomes from other species, the criteria  
339 established for this work were similar to other studies on this subject (Aono et al., 2021; Liu  
340 et al., 2020, 2015; Singh et al., 2014; Wei et al., 2014; Zhu et al., 2018a,b; Zulawski et al., 2014).

341 The high representativeness of the RLK-Pelle group among all kinases was noteworthy  
342 (Fig. 1). This occurrence is not surprising, as the high proportion of this group in the kinome

343 of plants is unanimous; on average, RLK-Pelle PKs represent 68.5% of RLKs in all kinomes  
344 studied to date (Aono et al., 2021; Ferreira-Neto et al., 2021; Liu et al., 2020, 2015; Singh et al.,  
345 2014; Wei & Li, 2019; Wei et al., 2014; Yan et al., 2018; Zhu et al., 2018a,b; Zulawski et al.,  
346 2014). Members of the RLK/Pelle family are directly involved in plant development, defense  
347 against pathogens, and responses to abiotic stresses (Lehti-Shiu & Shiu, 2012). The evolution  
348 of plants is likely associated with the expansion of subfamilies of this group, with special regard  
349 to the perception of pathogen signals and the subsequent triggering of immune responses. In  
350 fact, studies have shown an association between molecular markers, genes encoding RLK-LRR  
351 proteins and disease resistance (Binagwa et al., 2021; Vaz Bisneta & Gonçalves-Vidigal, 2020).  
352 The second most representative group among the kinases was the CAMK. Kinases of this group  
353 have been shown to act as primary sensors and to participate in various biological processes,  
354 such as the perception of calcium signals, the regulation of plant growth and development, and  
355 responses to biotic and abiotic stresses. According to Wei et al. (2014), the expansion of the  
356 CDPK family could be a consequence of the adaptive evolution of plants to perceive calcium  
357 signals. In our study 39 CAMK-CDPK proteins were found within this group.

358       Regarding the distribution of introns in common bean PKs, the maximum intron number  
359 observed was 28 – the same number found for soybean (Liu et al., 2015) and cowpea (Ferreira-  
360 Neto et al., 2021). Among available kinomes, the highest numbers of introns were found in  
361 grapevine (49) (Zhu et al., 2018b), sugarcane (52) (Aono et al., 2021), and pineapple (67) (Zhu  
362 et al., 2018a). The mean introns number found for common bean PKs (5.74) is lower than  
363 those found for strawberry (Liu et al., 2020) and pineapple (Zhu et al., 2018a), which were 6.45  
364 and 6.59, respectively. Of the 118 subfamilies of common bean PKs, 15 had members with  
365 the same number of introns, and for the remaining, most had a relatively conserved number of  
366 introns among their members, as was also observed for soybean (Liu et al., 2015). Additionally,  
367 163 common bean PK genes (13.5%) did present introns. In wheat, 11.9% of PKs showed no  
368 introns in their gene structure (Wei & Li, 2019), 9.5% in pineapple (Zhu et al., 2018a). Soybean,  
369 cowpea and grapevine have 12.1, 13.6 and 16.6%, respectively (Ferreira-Neto et al., 2021; Liu  
370 et al., 2015; Zhu et al., 2018b). In wheat, only 13.91% of PKs have more than 10 introns (Wei  
371 & Li, 2019).

372 At the family level, there is evidence of a link between the structural diversity of genes that  
373 are members of gene families and their evolution (Wei et al., 2014). In our study, the variation  
374 in the number of introns among PKs within the same subfamily was not large. In general,  
375 subfamilies showed conserved exon-intron structures, as observed by Yan et al. (2017), which  
376 may be related to their phylogenetic relationship. Most maize PK genes clustered in the same  
377 subfamily share similar intron structure, suggesting that intron gain and loss events contribute  
378 to the structural evolution of families (Wei et al., 2014). Liu et al. (2015) compared their  
379 results in soybean with those obtained for rice and maize, noting great similarity, referring  
380 the evolutionary history of PKs to times prior to the evolution of mono- and dicotyledons.  
381 Our results for common bean are similar to those for soybean, corroborating these conjectures.  
382 Divergent gene structures in different phylogenetic subfamilies may represent the expansion of  
383 the gene family (Wei et al., 2014), with kinase families having their own evolutionary expansions  
384 from the point of divergence (Liu et al., 2015). Conservation in the exon-intron structure of  
385 PKs, associated with growth and development processes, may originate from the emergence of  
386 land plants and thus be perpetuated (Yan et al., 2017).

#### 387 *4.1. Kinase protein properties*

388 The distribution of kinase domains found for common bean was quite similar to that ob-  
389 served for sorghum (Aono et al., 2021), grapevine (Zhu et al., 2018b), wheat Yan et al. (2017),  
390 and soybean (Liu et al., 2015). Regarding the number of proteins with multiple kinase do-  
391 mains, there was a variation in the number of subfamilies and members; the subfamilies that  
392 contained the most multi-kinases members were AGC\_RSK-2 and RLK-Pelle\_RLCK-XI, as  
393 equally noted for soybean (Liu et al., 2015). Additionally, in sorghum, sugarcane (Aono et al.,  
394 2021), grapevine (Zhu et al., 2018b), pineapple (Zhu et al., 2018a), and wheat (Yan et al., 2017),  
395 the AGC\_RSK-2 subfamily was also the most numerous. The second most numerous families  
396 were found to be RLK-Pelle\_WAK in sorghum (Aono et al., 2021), AGC\_NDR in wheat (Yan  
397 et al., 2017), and RLK-Pelle\_DLSV in sugarcane (Aono et al., 2021), grapevine (Zhu et al.,  
398 2018b) and pineapple (Zhu et al., 2018a). Only 36 (3%) of common bean PKs presented more  
399 than one kinase domain, which were distributed into 16 families. In soybean, the 74 PKs  
400 with such characteristics were distributed between 18 subfamilies, the most numerous being



401 AGC\_RSK-2 (38) and RLK-Pelle\_RLCK-XI (7) (Liu et al., 2015). In sugarcane, the 228 pro-  
402 teins with multiple kinase domains are distributed into 49 subfamilies, the most numerous being  
403 AGC\_RSK-2 (50) and RLK-Pelle\_DLSV (29), while in sorghum the 49 proteins are distributed  
404 into 13 subfamilies, with AGC\_RSK-2 (19) and RLK-Pelle\_WAK (11) being the most numerous  
405 (Aono et al., 2021). Differently, in strawberry, of the 954 PKs analyzed, 920 presented two or  
406 more kinase domains and, therefore, 34 presented only one kinase domain (Liu et al., 2020). In  
407 cowpea only 6 PKs have only 1 kinase domain, while the rest have a higher number of kinases  
408 (Ferreira-Neto et al., 2021).

409 The importance of predicting the subcellular localization of each one of the proteins of a  
410 species lies in determining its place of action, which can in turn suggest its function (Zhu et al.,  
411 2018a) in association with further information, such as structural domains. The fact that many  
412 common bean PKs are located in the cell membrane suggests the relevance of this superfamily  
413 in perceiving the extracellular environment and transducing vital information into cells (Zhu  
414 et al., 2018a). In sorghum, sugarcane (Aono et al., 2021), cowpea (Ferreira-Neto et al., 2021),  
415 wheat (Wei & Li, 2019), pineapple (Zhu et al., 2018a), grapevine (Zhu et al., 2018b), soybean  
416 (Liu et al., 2015), and *A. thaliana* (Zulawski et al., 2014) the PKs predicted to locate at the cell  
417 membrane are also the majority, with percentages ranging from 27.42% in grapevine to 49.63%  
418 in soybean. In strawberry, on the other hand, 55.77% of PKs were predicted to locate at the  
419 nucleus (Liu et al., 2020). In our study, 501 PKs had their subcellular localization predicted to  
420 the plasma membrane and, among these, 486 (97%) were classified as RLK-Pelle – reinforcing  
421 the importance of these proteins in cell signaling. While the vast majority of membrane PKs  
422 are RLKs, it cannot be said that all RLKs are membrane PKs. While most (58%) of these  
423 proteins were predicted to locate at the membrane, 13.7% of RLK-Pelle proteins predicted to be  
424 cytoplasmic, 9.8% extracellular and 9.5% nuclear; additionally, 4.5 and 4.4% of these proteins  
425 were predicted to locate at chloroplasts and mitochondria, respectively. The observations made  
426 for common bean were very similar to those obtained for soybean, including the location of the  
427 RLKs, which were also essentially located at the membrane (Liu et al., 2015). In strawberry,  
428 on the other hand, only 45.4% of the RLKs were predicted to locate at the membrane (Liu  
429 et al., 2020). In pineapple, 38% of PKs were predicted to be located at the membrane and more

430 than half of RLKs were membrane-located (Zhu et al., 2018a). PKs have great importance in  
431 sensing the environment and its response at the gene-expression level. The results observed for  
432 cowpea (Ferreira-Neto et al., 2021) are similar to the results found in our study.

433 Regarding PK pIs, the results found for common bean were similar to those of other species,  
434 such as sorghum, sugarcane (Aono et al., 2021), grapevine (Zhu et al., 2018b), and especially  
435 cowpea (Ferreira-Neto et al., 2021). However, for molecular mass, considerable differences were  
436 observed. The minimum molecular weight value of common bean PKs was higher than that  
437 observed for sugarcane, cowpea and grapevine, while the maximum value was lower than those  
438 found for sorghum, sugarcane, cowpea and grapevine. In grapevine, members of the same  
439 family share number of introns, pIs and molecular weight (Zhu et al., 2018b), while for cowpea  
440 the values of pI and molecular weight within families are highly variable (Ferreira-Neto et al.,  
441 2021). Our results follow the trend observed for cowpea, with highly variable values within the  
442 same family.

#### 443 *4.2. Duplication events*

444 Alike other species (Aono et al., 2021; Ferreira-Neto et al., 2021; Liu et al., 2015; Zhu  
445 et al., 2018a,b), the Pvu kinome presented a high percentage of PK gene pairs with a  $K_a/K_s$   
446 ratio below 1, indicating that they are under purifying selection. This indicates that selection  
447 has acted to conserve the structure and stabilize the function of PKs along their evolutionary  
448 history. In eukaryotes, this is thought to ensue an early phase of relaxed constraint or even  
449 near-neutrality for diversification (Lynch & Conery, 2000), and possibly occurred during PK  
450 evolution due to their vital importance in diverse biological processes (Janitza et al., 2012).

451 Both the presence of duplicated genes under purifying selection and the average  $K_a/K_s$  rate  
452 of common bean PKs (0.397) are concordant with previous findings from other gene families of  
453 this species, such as Dof (Ito et al., 2017), SBP transcription factors (Ilhan et al., 2018), CAMTA  
454 (Büyük et al., 2019), SRS (Büyük et al., 2022), and BURP domain-containing genes (Kavas  
455 et al., 2021). However, none of these studies – which analysed much smaller gene families  
456 – reported the high  $K_s$  values and distant dates of duplication we found for common bean  
457 PKs, dating up to 229 MYA. We observed a distinct peak in  $K_s$  values ranging around 0.65,  
458 corresponding to duplication events occurring 50 MYA; this coincides with a major WGD

459 experienced by the Fabaceae, estimated to have taken place 58 MYA (Lavin et al., 2005).  
460 A second, less evident peak can be observed in Ks values around 1.5-1.7, corresponding to  
461 duplications from 116-130 MYA; this can be associated with a whole-genome triplication event  
462 that took place in the core eudicots lineage, pinpointed at 117 MYA (Jiao et al., 2012). It is  
463 very likely that these two polyploidization events represent major forces in the diversification  
464 of common bean PKs, as also reported for legume transcription factor repertoires (Moharana &  
465 Venancio, 2020). Oddly, the influence of neither of these events was detected in the kinome of  
466 cowpea, a close relative of common bean. In the kinome of the slightly more distantly-related  
467 soybean, the Fabaceae-specific WGD Ks peak can be observed – although it is overshadowed  
468 by duplications arising from this species' more recent, lineage-specific, WGD ~13-59 MYA (Liu  
469 et al., 2015; Schmutz et al., 2010).

470 Specific PK subfamilies had a more pronounced occurrence of tandem duplications, mostly  
471 from the RLK-Pelle group (RLK-Pelle\_DLSV, RLK-Pelle\_LRK10L-2, RLK-Pelle\_CrRLK1L-  
472 1, RLK-Pelle\_LRR-III, and RLK-Pelle\_WAK\_LRK10L-1). In addition, RLK-Pelle\_DLSV and  
473 RLK-Pelle\_LRR-III were among the subfamilies with the largest diversity of protein domains.  
474 As tandemly duplicated PKs are known to be associated with stress responses (Freeling, 2009),  
475 we could also evidence the expansion of the scope of functionality of these subfamilies.

#### 476 *4.3. Gene expression estimation*

477 In our study, we incorporated several RNA-Seq datasets for estimating Pvu kinome expres-  
478 sion, which enabled a broad overview of the PK expression across different common bean  
479 genotypes and tissues. Although the most pronounced subfamilies in PK quantities were  
480 RLK-Pelle\_DLSV (11.64%), RLK-Pelle\_LRR-XI-1 (5.15%), RLK-Pelle\_CrRLK1L-1 (4.32%),  
481 and RLK-Pelle\_LRK10L-2 (4.41%), we found different subfamilies with the largest expression  
482 values (CMGC\_RCK, CMGC\_CK2, CMGC\_GSK, AGC\_PDK1, and CK1\_CK1-P1). Such find-  
483 ing indicates that even if a PK subfamily is highly abundant across the genome, its expression  
484 might not reflect it, as already pointed out by other kinome studies (Aono et al., 2021; Liu  
485 et al., 2015). Indeed, by evaluating the correlation between the PK abundance per subfamily  
486 and their expression, we did not find significant associations (Supplementary Table S20).

487 Different members of CMGC group presented the largest expression values, as also reported

488 by Aono et al. (2021); Liu et al. (2015); Zhu et al. (2018b). This result reinforces the high  
489 conservation of this group across several plant species (Kannan & Neuwald, 2004), and its  
490 multiple functions with effects on several signalling mechanisms (Wrzaczek et al., 2007). Several  
491 subfamilies presented variable expression values across their representatives, as highlighted by  
492 the high variation coefficients calculated (Supplementary Table S19), which corroborates the  
493 specific activation of PKs (Zhu et al., 2018a). Interestingly, although Group-Pl-4 subfamily  
494 did not present expressive expression values (99th highest expression), it was among the top  
495 5 subfamilies with the largest variation of expression within samples and also with one of the  
496 maximum expression values observed among the entire kinome in a stress associated sample.  
497 In addition to being highly conserved (Lehti-Shiu & Shiu, 2012), Zhu et al. (2018a) already  
498 reported the potential involvement of such a subfamily with photosynthesis.

499 Finally, modelling different coexpression networks made it possible the definition of several  
500 inferences across PK subfamilies interaction patterns, distinguished in two different structures  
501 for modelling control and stress related samples. The use of complex networks for modelling  
502 biological systems has enabled important contributions in the decipherment of unknown molec-  
503 ular associations across the literature (Fait et al., 2020; Tai et al., 2020; Zhang & Yin, 2020). In  
504 our study, each PK subfamily represents an element in the network (a node) and their putative  
505 associations (edges) are estimated through linear correlations, which indicate PK subfamilies  
506 that are functionally cohesive, co-regulated or correspond to similar pathways (Mitra et al.,  
507 2013). From such a structure, network measures can be used for biological inferences, including  
508 central elements in the network structure (hubs), which are generally associated with regulators  
509 over the biological mechanisms modeled (Barabasi & Oltvai, 2004), and also connections with  
510 elevated network vulnerability (edges with high betweenness), i.e. connections permeating a  
511 high flow of communication between network elements. Considering the PK networks modeled,  
512 edges with high betweenness measures may represent crucial mechanisms for the maintenance  
513 of the overall PK interactions (Aono et al., 2021).

514 Although possessing a common core structure, the networks modeled presented several  
515 differences in their topology. First, the detachment of the network with samples under adverse  
516 conditions into two communities potentially indicates the disturbance of the previous network

517 because of external factors into the complex system, namely the different adverse circumstances  
518 in which the genotypes were evaluated. As already known, the activation of PKs is directly  
519 affected by external stimuli and stress factors (Jaggi, 2018; Morris, 2001), and this aspect can  
520 be inferred from the networks modeled. Additionally, the large quantity of connections in the  
521 control network indicates a more cohesive structure with less vulnerability points; this suggests  
522 that the subfamily interactions presented a more synergistic activity than the interactions  
523 between the expression of subfamilies under stress. Indeed, such finding can be also visualized  
524 in the connections with higher betweenness values (Fig. 4).

525 In the network of control samples, we only found points of vulnerability between single  
526 subfamilies and the main core group, formed by a cohesive set of PK subfamilies interactions.  
527 However, in the other network, such edges with high betweenness seem to have a bigger im-  
528 pact into the network architecture (Fig. 4C). Members of the subfamilies RLK-Pelle\_RLCK  
529 and RLK-Pelle\_LRR were present in the edges among the top 5 betweenness values of both  
530 networks. Interestingly, other subfamilies in the vulnerable edges of the control network (TKL-  
531 Pl-8, CMGC\_CDK-PITSLRE, and Group-Pl-4) were disconnected elements in the stress net-  
532 work. This demonstrates that the existent vulnerabilities become more pronounced in adverse  
533 conditions, and also reinforces the importance of the RLK-Pelle group (Bolhassani et al., 2021).

534 By contrasting the other subfamilies present in the high betweenness edges in the stress  
535 related network with their connection profile in the control network, we can visualize that  
536 AGC\_RSK-2, AGC\_PKA-PKG, and NEK presented median hub scores, i.e. they have a sig-  
537 nificant amount of connections, which are significantly reduced in the network modeled with  
538 samples under adverse conditions. In the same way, STE\_STE-Pl subfamily presented the same  
539 profile, but with a more elevated hub score, which was close to the top values in the control  
540 network. Such findings corroborate the potential of biological inferences with the use of com-  
541 plex networks and highlight this set of PK subfamilies for deeper investigations over Pvu stress  
542 responses.

543 Regarding the key elements in both networks, measured through hub scores, we found  
544 CK1\_CK1-Pl and TKL-Pl-4 among the top 5 in both structures. Although we found differences  
545 in other hub elements, similar connection profiles could be observed. For instance, CMGC\_CK2

546 and CMGC\_GSK ranked in the top 5 hubs in the control network, and in the network modeled  
547 with samples under adverse conditions such families did not present low hub scores. The  
548 same was observed for the other hubs of the adverse network (CAMK\_CDPK, TKL-PI-2, and  
549 AGC\_MAST). Even not being in the top 5 of the control network, the values were close to the  
550 highest hub score. Interestingly, the subfamily STE\_STE20-Fray was considered a hub in the  
551 control network, however in the adverse related network it had a low hub score in the adverse  
552 condition, which shows a probable impact of stress into this PK subfamily.

## 553 **5. Conclusion**

554 The common bean has a large importance for agriculture, representing a good source of  
555 nutrition. Considering the well-established role of PKs over stress responses and the diverse  
556 stresses affecting bean production, the characterization performed in our study represents an  
557 important contribution to Pvu research, cataloging a vast and rich reservoir of data. By profiling  
558 1,203 Pvu PKs, we provided significant insights into Pvu PK organization, highly variable func-  
559 tional profile, structural diversity and evolution, and expression patterns. Finally, by modelling  
560 the PK interactions through coexpression networks, we could highlight a set of PK subfamilies  
561 potentially associated with bean stress responses.

## 562 **Acknowledgements**

563 This work was supported by grants from the Fundação de Amparo à Pesquisa do Estado  
564 de São Paulo (FAPESP), the Fundação de Amparo à Pesquisa do Estado de Minas Gerais  
565 (FAPEMIG), the Conselho Nacional de Desenvolvimento Científico e Tecnológico (CNPQ), and  
566 the Coordenação de Aperfeiçoamento de Pessoal de Nível Superior (CAPES, Computational  
567 Biology Programme). AA received a PhD fellowship from FAPESP (2019/03232-6) and RP  
568 received a PhD fellowship from FAPESP (2019/21682-9).

## 569 **Author contributions**

570 AA, RP and WP performed all analyses and wrote the manuscript. CD and FC assisted in  
571 the kinase functional analyses. WP, RK and AS conceived the project. All authors reviewed,  
572 read and approved the manuscript.

## 573 References

- 574 Andrews, S. (2010). Fastqc: a quality control tool for high throughput sequence data. version  
575 0.11. 2. *Website: <http://www.bioinformatics.babraham.ac.uk/projects/fastqc>, .*
- 576 Aono, A. H., Pimenta, R. J. G., Garcia, A. L. B., Correr, F. H., Hosaka, G. K., Carrasco, M. M.,  
577 Cardoso-Silva, C. B., Mancini, M. C., Sforça, D. A., Dos Santos, L. B. et al. (2021). The  
578 wild sugarcane and sorghum kinomes: Insights into expansion, diversification, and expression  
579 patterns. *Frontiers in Plant Science*, (p. 589).
- 580 Armenteros, J. J. A., Tsirigos, K. D., Sønderby, C. K., Petersen, T. N., Winther, O., Brunak,  
581 S., von Heijne, G., & Nielsen, H. (2019). Signalp 5.0 improves signal peptide predictions  
582 using deep neural networks. *Nature biotechnology*, *37*, 420–423.
- 583 Artimo, P., Jonnalagedda, M., Arnold, K., Baratin, D., Csardi, G., De Castro, E., Duvaud,  
584 S., Flegel, V., Fortier, A., Gasteiger, E. et al. (2012). Expasy: Sib bioinformatics resource  
585 portal. *Nucleic acids research*, *40*, W597–W603.
- 586 Ashburner, M., Ball, C. A., Blake, J. A., Botstein, D., Butler, H., Cherry, J. M., Davis, A. P.,  
587 Dolinski, K., Dwight, S. S., Eppig, J. T. et al. (2000). Gene ontology: tool for the unification  
588 of biology. *Nature genetics*, *25*, 25–29.
- 589 Bairoch, A., & Apweiler, R. (2000). The swiss-prot protein sequence database and its supple-  
590 ment trembl in 2000. *Nucleic acids research*, *28*, 45–48.
- 591 Barabasi, A.-L., & Oltvai, Z. N. (2004). Network biology: understanding the cell’s functional  
592 organization. *Nature reviews genetics*, *5*, 101–113.
- 593 Basavaraja, T., Pratap, A., Dubey, V., Gurumurthy, S., Gupta, S., & Singh, N. (2020). Molec-  
594 ular and conventional breeding strategies for improving biotic stress resistance in common  
595 bean. In *Accelerated Plant Breeding, Volume 3* (pp. 389–421). Springer.
- 596 Beebe, S. E., Rao, I. M., Blair, M. W., & Butare, L. (2009). Breeding for abiotic stress tolerance  
597 in common bean: present and future challenges, .

- 598 Ben Rejeb, I., Pastor, V., & Mauch-Mani, B. (2014). Plant responses to simultaneous biotic  
599 and abiotic stress: molecular mechanisms. *Plants*, *3*, 458–475.
- 600 Binagwa, P. H., Traore, S. M., Egnin, M., Bernard, G. C., Ritte, I., Mortley, D., Kamfwa, K.,  
601 He, G., & Bonsi, C. (2021). Genome-wide identification of powdery mildew resistance in  
602 common bean (*Phaseolus vulgaris* L.). *Frontiers in genetics*, (p. 905).
- 603 Bolger, A. M., Lohse, M., & Usadel, B. (2014). Trimmomatic: a flexible trimmer for illumina  
604 sequence data. *Bioinformatics*, *30*, 2114–2120.
- 605 Bolhassani, M., Niazi, A., Tahmasebi, A., & Moghadam, A. (2021). Identification of key genes  
606 associated with secondary metabolites biosynthesis by system network analysis in *Valeriana*  
607 *officinalis*. *Journal of plant research*, *134*, 625–639.
- 608 Brandes, U. (2001). A faster algorithm for betweenness centrality. *Journal of mathematical*  
609 *sociology*, *25*, 163–177.
- 610 Büyük, İ., İlhan, E., Şener, D., Özsoy, A. U., & Aras, S. (2019). Genome-wide identification  
611 of camta gene family members in *Phaseolus vulgaris* L. and their expression profiling during  
612 salt stress. *Molecular biology reports*, *46*, 2721–2732.
- 613 Büyük, İ., Okay, A., & Aras, S. (2022). Identification and characterization of srs genes in  
614 *Phaseolus vulgaris* genome and their responses under salt stress. *Biochemical Genetics*, *60*,  
615 482–503.
- 616 Conab (2022). Conab. <http://www.conab.gov.br>. Accessed: 2022-10-06.
- 617 Conesa, A., & Göttsch, S. (2008). Blast2go: a comprehensive suite for functional analysis in plant  
618 genomics. *International journal of plant genomics*, *2008*.
- 619 Consortium, U. (2019). Uniprot: a worldwide hub of protein knowledge. *Nucleic acids research*,  
620 *47*, D506–D515.
- 621 Cooper, B., Campbell, K. B., Beard, H. S., Garrett, W. M., & Ferreira, M. E. (2020). The pro-  
622 teomics of resistance to halo blight in common bean. *Molecular Plant-Microbe Interactions*,  
623 *33*, 1161–1175.



- 624 Csardi, G., Nepusz, T. et al. (2006). The igraph software package for complex network research.  
625 *InterJournal, complex systems, 1695*, 1–9.
- 626 Edgar, R. C. (2004). Muscle: multiple sequence alignment with high accuracy and high through-  
627 put. *Nucleic acids research, 32*, 1792–1797.
- 628 El-Gebali, S., Mistry, J., Bateman, A., Eddy, S. R., Luciani, A., Potter, S. C., Qureshi, M.,  
629 Richardson, L. J., Salazar, G. A., Smart, A. et al. (2019). The pfam protein families database  
630 in 2019. *Nucleic acids research, 47*, D427–D432.
- 631 Fait, A., Batushansky, A., Shrestha, V., Yobi, A., & Angelovici, R. (2020). Can metabolic tight-  
632 ening and expansion of co-expression network play a role in stress response and tolerance?  
633 *Plant Science, 293*, 110409.
- 634 Ferreira-Neto, J. R. C., Borges, A. N. d. C., da Silva, M. D., Morais, D. A. d. L., Bezerra-  
635 Neto, J. P., Bourque, G., Kido, E. A., & Benko-Iseppon, A. M. (2021). The cowpea kinome:  
636 Genomic and transcriptomic analysis under biotic and abiotic stresses. *Frontiers in Plant*  
637 *Science*, (p. 945).
- 638 Finn, R. D., Clements, J., & Eddy, S. R. (2011). Hmmer web server: interactive sequence  
639 similarity searching. *Nucleic acids research, 39*, W29–W37.
- 640 Freeling, M. (2009). Bias in plant gene content following different sorts of duplication: tandem,  
641 whole-genome, segmental, or by transposition. *Annual review of plant biology, 60*, 433–453.
- 642 Gaut, B. S., Morton, B. R., McCaig, B. C., & Clegg, M. T. (1996). Substitution rate com-  
643 parisons between grasses and palms: synonymous rate differences at the nuclear gene *adh*  
644 parallel rate differences at the plastid gene *rbcl*. *Proceedings of the National Academy of*  
645 *Sciences, 93*, 10274–10279.
- 646 Goodstein, D. M., Shu, S., Howson, R., Neupane, R., Hayes, R. D., Fazo, J., Mitros, T., Dirks,  
647 W., Hellsten, U., Putnam, N. et al. (2012). Phytozome: a comparative platform for green  
648 plant genomics. *Nucleic acids research, 40*, D1178–D1186.

- 649 Gunness, P., & Gidley, M. J. (2010). Mechanisms underlying the cholesterol-lowering properties  
650 of soluble dietary fibre polysaccharides. *Food & function*, *1*, 149–155.
- 651 Hanks, S. K., & Hunter, T. (1995). The eukaryotic protein kinase superfamily: kinase (catalytic)  
652 domain structure and classification 1. *The FASEB journal*, *9*, 576–596.
- 653 Hiz, M. C., Canher, B., Niron, H., & Turet, M. (2014). Transcriptome analysis of salt tolerant  
654 common bean (*phaseolus vulgaris* l.) under saline conditions. *PloS one*, *9*, e92598.
- 655 Horton, P., Park, K.-J., Obayashi, T., Fujita, N., Harada, H., Adams-Collier, C., & Nakai, K.  
656 (2007). Wolf psort: protein localization predictor. *Nucleic acids research*, *35*, W585–W587.
- 657 Hutchins, A. M., Winham, D. M., & Thompson, S. V. (2012). Phaseolus beans: impact on  
658 glycaemic response and chronic disease risk in human subjects. *British Journal of Nutrition*,  
659 *108*, S52–S65.
- 660 Ilhan, E. et al. (2018). Genome-wide characterization and analysis of sbp transcription factor  
661 family in common bean (*phaseolus vulgaris* l.). *Applied Ecology and Environmental Research*,  
662 *16*, 5467–5480.
- 663 Ito, T. M., Trevizan, C. B., dos Santos, T. B., & de Souza, S. G. H. (2017). Genome-wide  
664 identification and characterization of the dof transcription factor gene family in *phaseolus*  
665 *vulgaris* l. *American Journal of Plant Sciences*, *8*, 3233–3257.
- 666 Jaggi, M. (2018). Recent advancement on map kinase cascade in biotic stress. In *Molecular*  
667 *aspects of plant-pathogen interaction* (pp. 139–158). Springer.
- 668 Janitza, P., Ullrich, K. K., & Quint, M. (2012). Toward a comprehensive phylogenetic re-  
669 construction of the evolutionary history of mitogen-activated protein kinases in the plant  
670 kingdom. *Frontiers in plant science*, *3*, 271.
- 671 Jiao, Y., Leebens-Mack, J., Ayyampalayam, S., Bowers, J. E., McKain, M. R., McNeal, J.,  
672 Rolf, M., Ruzicka, D. R., Wafula, E., Wickett, N. J. et al. (2012). A genome triplication  
673 associated with early diversification of the core eudicots. *Genome biology*, *13*, 1–14.

- 674 Kamfwa, K., Zhao, D., Kelly, J. D., & Cichy, K. A. (2017). Transcriptome analysis of two  
675 recombinant inbred lines of common bean contrasting for symbiotic nitrogen fixation. *Plos*  
676 *One*, *12*, e0172141.
- 677 Kannan, N., & Neuwald, A. F. (2004). Evolutionary constraints associated with functional  
678 specificity of the cmgc protein kinases mapk, cdk, gsk, srpk, dyrk, and ck2 $\alpha$ . *Protein Science*,  
679 *13*, 2059–2077.
- 680 Kavas, M., Yildirim, K., Seçgin, Z., Abdulla, M. F., & Gökdemir, G. (2021). Genome-wide  
681 identification of the burp domain-containing genes in phaseolus vulgaris. *Physiology and*  
682 *Molecular Biology of Plants*, *27*, 1885–1902.
- 683 Keates, R. (1973). Cyclic nucleotide-independent protein kinase from pea shoots. *Biochemical*  
684 *and biophysical research communications*, *54*, 655–661.
- 685 Khankhum, S., Sela, N., Osorno, J. M., & Valverde, R. A. (2016). Rnaseq analysis of  
686 endornavirus-infected vs. endornavirus-free common bean (phaseolus vulgaris) cultivar black  
687 turtle soup. *Frontiers in microbiology*, *7*, 1905.
- 688 Kleinberg, J. M. (1999). Authoritative sources in a hyperlinked environment. *Journal of the*  
689 *ACM (JACM)*, *46*, 604–632.
- 690 Kolde, R., & Kolde, M. R. (2015). Package ‘pheatmap’. *R package*, *1*, 790.
- 691 Krogh, A., Larsson, B., Von Heijne, G., & Sonnhammer, E. L. (2001). Predicting trans-  
692 membrane protein topology with a hidden markov model: application to complete genomes.  
693 *Journal of molecular biology*, *305*, 567–580.
- 694 Krzywinski, M., Schein, J., Birol, I., Connors, J., Gascoyne, R., Horsman, D., Jones, S. J., &  
695 Marra, M. A. (2009). Circos: an information aesthetic for comparative genomics. *Genome*  
696 *research*, *19*, 1639–1645.
- 697 Lavin, M., Herendeen, P. S., & Wojciechowski, M. F. (2005). Evolutionary rates analysis of  
698 leguminosae implicates a rapid diversification of lineages during the tertiary. *Systematic*  
699 *biology*, *54*, 575–594.

- 700 Lawton, M. A., Yamamoto, R. T., Hanks, S. K., & Lamb, C. J. (1989). Molecular cloning of  
701 plant transcripts encoding protein kinase homologs. *Proceedings of the National Academy of*  
702 *Sciences*, *86*, 3140–3144.
- 703 Lehti-Shiu, M. D., & Shiu, S.-H. (2012). Diversity, classification and function of the plant  
704 protein kinase superfamily. *Philosophical Transactions of the Royal Society B: Biological*  
705 *Sciences*, *367*, 2619–2639.
- 706 Leinonen, R., Sugawara, H., Shumway, M., & Collaboration, I. N. S. D. (2010). The sequence  
707 read archive. *Nucleic acids research*, *39*, D19–D21.
- 708 Liu, H., Qu, W., Zhu, K., & Cheng, Z.-M. M. (2020). The wild strawberry kinome: identi-  
709 fication, classification and transcript profiling of protein kinases during development and in  
710 response to gray mold infection. *BMC genomics*, *21*, 1–14.
- 711 Liu, J., Chen, N., Grant, J. N., Cheng, Z.-M., Stewart Jr, C. N., & Hewezi, T. (2015). Soy-  
712 bean kinome: functional classification and gene expression patterns. *Journal of experimental*  
713 *botany*, *66*, 1919–1934.
- 714 Lu, Z., Marand, A. P., Ricci, W. A., Ethridge, C. L., Zhang, X., & Schmitz, R. J. (2019). The  
715 prevalence, evolution and chromatin signatures of plant regulatory elements. *Nature Plants*,  
716 *5*, 1250–1259.
- 717 Lynch, M., & Conery, J. S. (2000). The evolutionary fate and consequences of duplicate genes.  
718 *science*, *290*, 1151–1155.
- 719 Manning, G., Whyte, D. B., Martinez, R., Hunter, T., & Sudarsanam, S. (2002). The protein  
720 kinase complement of the human genome. *Science*, *298*, 1912–1934.
- 721 Marathe, S. A., Rajalakshmi, V., Jamdar, S. N., & Sharma, A. (2011). Comparative study on  
722 antioxidant activity of different varieties of commonly consumed legumes in india. *Food and*  
723 *Chemical Toxicology*, *49*, 2005–2012.
- 724 Melotto, M., & Kelly, J. (2001). Fine mapping of the co-4 locus of common bean reveals a

- 725 resistance gene candidate, *cok-4*, that encodes for a protein kinase. *Theoretical and Applied*  
726 *Genetics*, *103*, 508–517.
- 727 Messina, V. (2014). Nutritional and health benefits of dried beans. *The American journal of*  
728 *clinical nutrition*, *100*, 437S–442S.
- 729 Miller, M. A., Pfeiffer, W., & Schwartz, T. (2011). The cipes science gateway: a community  
730 resource for phylogenetic analyses. In *Proceedings of the 2011 TeraGrid Conference: extreme*  
731 *digital discovery* (pp. 1–8).
- 732 Mitchell, D. C., Lawrence, F. R., Hartman, T. J., & Curran, J. M. (2009). Consumption of  
733 dry beans, peas, and lentils could improve diet quality in the us population. *Journal of the*  
734 *American dietetic association*, *109*, 909–913.
- 735 Mitra, K., Carvunis, A.-R., Ramesh, S. K., & Ideker, T. (2013). Integrative approaches for  
736 finding modular structure in biological networks. *Nature Reviews Genetics*, *14*, 719–732.
- 737 Moharana, K. C., & Venancio, T. M. (2020). Polyploidization events shaped the transcription  
738 factor repertoires in legumes (fabaceae). *The Plant Journal*, *103*, 726–741.
- 739 Morris, P. C. (2001). Map kinase signal transduction pathways in plants. *New Phytologist*,  
740 *151*, 67–89.
- 741 Oblessuc, P. R., Francisco, C., & Melotto, M. (2015). The *co-4* locus on chromosome pv08  
742 contains a unique cluster of 18 *cok-4* genes and is regulated by immune response in common  
743 bean. *Theoretical and Applied Genetics*, *128*, 1193–1208.
- 744 O'Rourke, J. A., Iniguez, L. P., Fu, F., Bucciarelli, B., Miller, S. S., Jackson, S. A., McClean,  
745 P. E., Li, J., Dai, X., Zhao, P. X. et al. (2014). An rna-seq based gene expression atlas of the  
746 common bean. *BMC genomics*, *15*, 1–17.
- 747 Patro, R., Duggal, G., Love, M. I., Irizarry, R. A., & Kingsford, C. (2017). Salmon provides  
748 fast and bias-aware quantification of transcript expression. *Nature methods*, *14*, 417–419.
- 749 Price, M. N., Dehal, P. S., & Arkin, A. P. (2010). Fasttree 2—approximately maximum-likelihood  
750 trees for large alignments. *PloS one*, *5*, e9490.

- 751 R Core Team (2013). R: A language and environment for statistical computing, .
- 752 Raghavan, U. N., Albert, R., & Kumara, S. (2007). Near linear time algorithm to detect  
753 community structures in large-scale networks. *Physical review E*, *76*, 036106.
- 754 Richard, M. M., Gratias, A., Alvarez Diaz, J. C., Thareau, V., Pflieger, S., Meziadi, C.,  
755 Blanchet, S., Marande, W., Bitocchi, E., Papa, R. et al. (2021). A common bean truncated  
756 crinkly4 kinase controls gene-for-gene resistance to the fungus colletotrichum lindemuthi-  
757 anum. *Journal of Experimental Botany*, *72*, 3569–3581.
- 758 Schmutz, J., Cannon, S. B., Schlueter, J., Ma, J., Mitros, T., Nelson, W., Hyten, D. L., Song,  
759 Q., Thelen, J. J., Cheng, J. et al. (2010). Genome sequence of the palaeopolyploid soybean.  
760 *nature*, *463*, 178–183.
- 761 Schmutz, J., McClean, P. E., Mamidi, S., Wu, G. A., Cannon, S. B., Grimwood, J., Jenkins,  
762 J., Shu, S., Song, Q., Chavarro, C. et al. (2014). A reference genome for common bean and  
763 genome-wide analysis of dual domestications. *Nature genetics*, *46*, 707–713.
- 764 Silva, D. A. d., Tsai, S. M., Chiorato, A. F., da Silva Andrade, S. C., Esteves, J. A. d. F.,  
765 Recchia, G. H., & Morais Carbonell, S. A. (2019). Analysis of the common bean (*Phaseolus*  
766 *vulgaris* L.) transcriptome regarding efficiency of phosphorus use. *PloS one*, *14*, e0210428.
- 767 Singh, D. K., Calviño, M., Brauer, E. K., Fernandez-Pozo, N., Strickler, S., Yalamanchili, R.,  
768 Suzuki, H., Aoki, K., Shibata, D., Stratmann, J. W. et al. (2014). The tomato kinome  
769 and the tomato kinase library orfeome: novel resources for the study of kinases and signal  
770 transduction in tomato and solanaceae species. *Molecular Plant-Microbe Interactions*, *27*,  
771 7–17.
- 772 Singh, S., & Schwartz, H. (2010). Breeding common bean for resistance to insect pests and  
773 nematodes. *Canadian Journal of Plant Science*, *91*, 239–250.
- 774 Sperschneider, J., Catanzariti, A.-M., DeBoer, K., Petre, B., Gardiner, D. M., Singh, K. B.,  
775 Dodds, P. N., & Taylor, J. M. (2017). Localizer: subcellular localization prediction of both  
776 plant and effector proteins in the plant cell. *Scientific reports*, *7*, 1–14.

- 777 Supek, F., Bošnjak, M., Škunca, N., & Šmuc, T. (2011). Revigo summarizes and visualizes  
778 long lists of gene ontology terms. *PLoS one*, *6*, e21800.
- 779 Tai, Y., Ling, C., Wang, C., Wang, H., Su, L., Yang, L., Jiang, W., Yu, X., Zheng, L., Feng, Z.  
780 et al. (2020). Analysis of terpenoid biosynthesis pathways in german chamomile (*matricaria*  
781 *recutita*) and roman chamomile (*chamaemelum nobile*) based on co-expression networks.  
782 *Genomics*, *112*, 1055–1064.
- 783 Vasconcellos, R. C., Oraguzie, O. B., Soler, A., Arkwazee, H., Myers, J. R., Ferreira, J. J.,  
784 Song, Q., McClean, P., & Miklas, P. N. (2017). Meta-qt1 for resistance to white mold in  
785 common bean. *PLoS One*, *12*, e0171685.
- 786 Vaz Bisneta, M., & Gonçalves-Vidigal, M. C. (2020). Integration of anthracnose resistance loci  
787 and r1k and nbs-lrr-encoding genes in the phaseolus vulgaris l. genome. *Crop Science*, *60*,  
788 2901–2918.
- 789 Villanueva, R. A. M., & Chen, Z. J. (2019). ggplot2: elegant graphics for data analysis.
- 790 Voorrips, R. (2002). Mapchart: software for the graphical presentation of linkage maps and  
791 qtl. *Journal of heredity*, *93*, 77–78.
- 792 Wang, Y., Tang, H., DeBarry, J. D., Tan, X., Li, J., Wang, X., Lee, T.-h., Jin, H., Marler, B.,  
793 Guo, H. et al. (2012). Mscanx: a toolkit for detection and evolutionary analysis of gene  
794 synteny and collinearity. *Nucleic acids research*, *40*, e49–e49.
- 795 Wei, K., & Li, Y. (2019). Functional genomics of the protein kinase superfamily from wheat.  
796 *Molecular Breeding*, *39*, 1–23.
- 797 Wei, K., Wang, Y., & Xie, D. (2014). Identification and expression profile analysis of the  
798 protein kinase gene superfamily in maize development. *Molecular Breeding*, *33*, 155–172.
- 799 Wrzaczek, M., Rozhon, W., & Jonak, C. (2007). A proteasome-regulated glycogen synthase  
800 kinase-3 modulates disease response in plants. *Journal of Biological Chemistry*, *282*, 5249–  
801 5255.

- 802 Yan, J., Li, G., Guo, X., Li, Y., & Cao, X. (2018). Genome-wide classification, evolutionary  
803 analysis and gene expression patterns of the kinome in gossypium. *PloS one*, *13*, e0197392.
- 804 Yan, J., Su, P., Wei, Z., Nevo, E., & Kong, L. (2017). Genome-wide identification, classification,  
805 evolutionary analysis and gene expression patterns of the protein kinase gene family in wheat  
806 and *aegilops tauschii*. *Plant molecular biology*, *95*, 227–242.
- 807 Ye, Y., Ding, Y., Jiang, Q., Wang, F., Sun, J., & Zhu, C. (2017). The role of receptor-like  
808 protein kinases (rlks) in abiotic stress response in plants. *Plant cell reports*, *36*, 235–242.
- 809 Yu, C.-S., Chen, Y.-C., Lu, C.-H., & Hwang, J.-K. (2006). Prediction of protein subcellular  
810 localization. *Proteins: Structure, Function, and Bioinformatics*, *64*, 643–651.
- 811 Yu, G., Smith, D. K., Zhu, H., Guan, Y., & Lam, T. T.-Y. (2017). ggtree: an r package for  
812 visualization and annotation of phylogenetic trees with their covariates and other associated  
813 data. *Methods in Ecology and Evolution*, *8*, 28–36.
- 814 Zhang, H., & Yin, T. (2020). Analysis of topology properties in different tissues of poplar based  
815 on gene co-expression networks. *Tree Genetics & Genomes*, *16*, 1–12.
- 816 Zhu, K., Liu, H., Chen, X., Cheng, Q., & Cheng, Z.-M. M. (2018a). The kinome of pineap-  
817 ple: catalog and insights into functions in crassulacean acid metabolism plants. *BMC plant*  
818 *biology*, *18*, 1–16.
- 819 Zhu, K., Wang, X., Liu, J., Tang, J., Cheng, Q., Chen, J.-G., & Cheng, Z.-M. M. (2018b).  
820 The grapevine kinome: annotation, classification and expression patterns in developmental  
821 processes and stress responses. *Horticulture Research*, *5*.
- 822 Zulawski, M., Schulze, G., Braginets, R., Hartmann, S., & Schulze, W. X. (2014). The ara-  
823 bidopsis kinome: phylogeny and evolutionary insights into functional diversification. *BMC*  
824 *genomics*, *15*, 1–15.

## 825 **Supplementary Tables**

826 **Table S1.** Organization of bean RNA-Seq experiments.



- 827 **Table S2.** Kinase domain annotation of the 1,203 bean protein kinases.
- 828 **Table S3.** Subfamily kinase classification of the bean 1,203 kinases.
- 829 **Table S4.** Bean kinase subfamily quantification.
- 830 **Table S5.** Localization and intron quantity of the 1,203 bean kinases.
- 831 **Table S6.** Bean kinase distribution across chromosomes.
- 832 **Table S7.** Domain annotation of the 1,203 bean protein kinases.
- 833 **Table S8.** Domain organization of the 1,203 bean protein kinases.
- 834 **Table S9.** Kinase domain organization for proteins with multiple kinase domains.
- 835 **Table S10.** Compositional analyses of the 1,203 kinases.
- 836 **Table S11.** Gene Ontology (GO) annotations for the 1,203 bean kinases.
- 837 **Table S12.** Characteristics of bean kinase subfamilies.
- 838 **Table S13.** Presence of domains presence across bean kinase subfamilies.
- 839 **Table S14.** Duplication origin of the bean 1,203 kinases.
- 840 **Table S15.** Collinearity events and  $K_a/K_s$  values of bean protein kinases.
- 841 **Table S16.** Kinase TPM values across samples.
- 842 **Table S17.** Kinase subfamily quantification across samples.
- 843 **Table S18.** Kinase subfamily quantification across tissues in the selected genotypes.
- 844 **Table S19.** Descriptive statistics of subfamily expression across kinase subfamilies.
- 845 **Table S20.** Spearman correlation of average TPM values in bean genotypes/tissues with kinase  
846 subfamily quantities.
- 847 **Table S21.** Kinase subfamily coexpression network characterization (control samples).
- 848 **Table S22.** Edge betweenness values calculated across the bean coexpression network (control  
849 samples).
- 850 **Table S23.** Kinase subfamily coexpression network characterization (adverse samples).
- 851 **Table S24.** Edge betweenness values calculated across the bean coexpression network (adverse  
852 samples).

## 853 Supplementary Figures

854 **Fig. S1.** Phylogenetic analysis of the identified protein kinases in *Phaseolus vulgaris* (Phvul).  
855 Each protein is separated on the right side of the tree and is presented with its classification  
856 with respect to the kinase subfamilies, which are colored to represent the differences among  
857 subfamilies.

858 **Fig. S2.** Phylogenetic analysis of the identified protein kinases in *Phaseolus vulgaris* in a  
859 circular layout. Each protein is colored with respect to the kinase subfamily classification.

860 **Fig. S3.** Kinase subfamily quantification analysis in different plant species. Each row indicates  
861 a different subfamily and each column a plant species, and the numbers of kinases are noted.  
862 This heatmap is colored according to the distribution of quantities present in the datasets on  
863 a scale of beige to dark red.

864 **Fig. S4.** Gene Ontology (GO) category annotation of biological processes in the entire set  
865 of *Phaseolus vulgaris* kinases. The size of the subdivisions within the blocks represents the  
866 abundance of that category in this set of kinases.

867 **Fig. S5.** Segmental duplication events in the *Phaseolus vulgaris* genome. The colors indicate  
868 the selection type of the gene pair duplication (gray indicates negative selection and orange  
869 positive selection).

870 **Fig. S6.** RNA expression profiles of *Phaseolus vulgaris* kinases (control samples), shown on  
871 a heatmap indicating the average sample values of different combinations of genotypes and  
872 tissues (columns) and considering the organization of kinase subfamilies (rows).

873 **Fig. S7.** RNA expression profiles of *Phaseolus vulgaris* kinases (stress submitted samples),  
874 shown on a heatmap indicating the average sample values of different combinations of genotypes  
875 and tissues (columns) and considering the organization of kinase subfamilies (rows).

876 **Fig. S8.** Coexpression networks for *Phaseolus vulgaris* kinase subfamilies (control samples).  
877 Each node corresponds to a different subfamily, its size corresponds to the average expression  
878 value for all kinases within the subfamily in different samples, and its color corresponds to the  
879 hub score and ranges from beige to dark brown. Each edge corresponds to a correlation with  
880 a Pearson correlation coefficient of at least 0.6. The correlation strength is represented by the  
881 edge's width and the edge betweenness score is represented by the color (ranging from black to

882 red, with red representing the highest values).

883 **Fig. S9.** Coexpression networks for *Phaseolus vulgaris* kinase subfamilies (stress submitted  
884 samples). Each node corresponds to a different subfamily, its size corresponds to the average  
885 expression value for all kinases within the subfamily in different samples, and its color corre-  
886 sponds to the hub score and ranges from beige to dark brown. Each edge corresponds to a  
887 correlation with a Pearson correlation coefficient of at least 0.6. The correlation strength is  
888 represented by the edge's width and the edge betweenness score is represented by the color  
889 (ranging from black to red, with red representing the highest values).

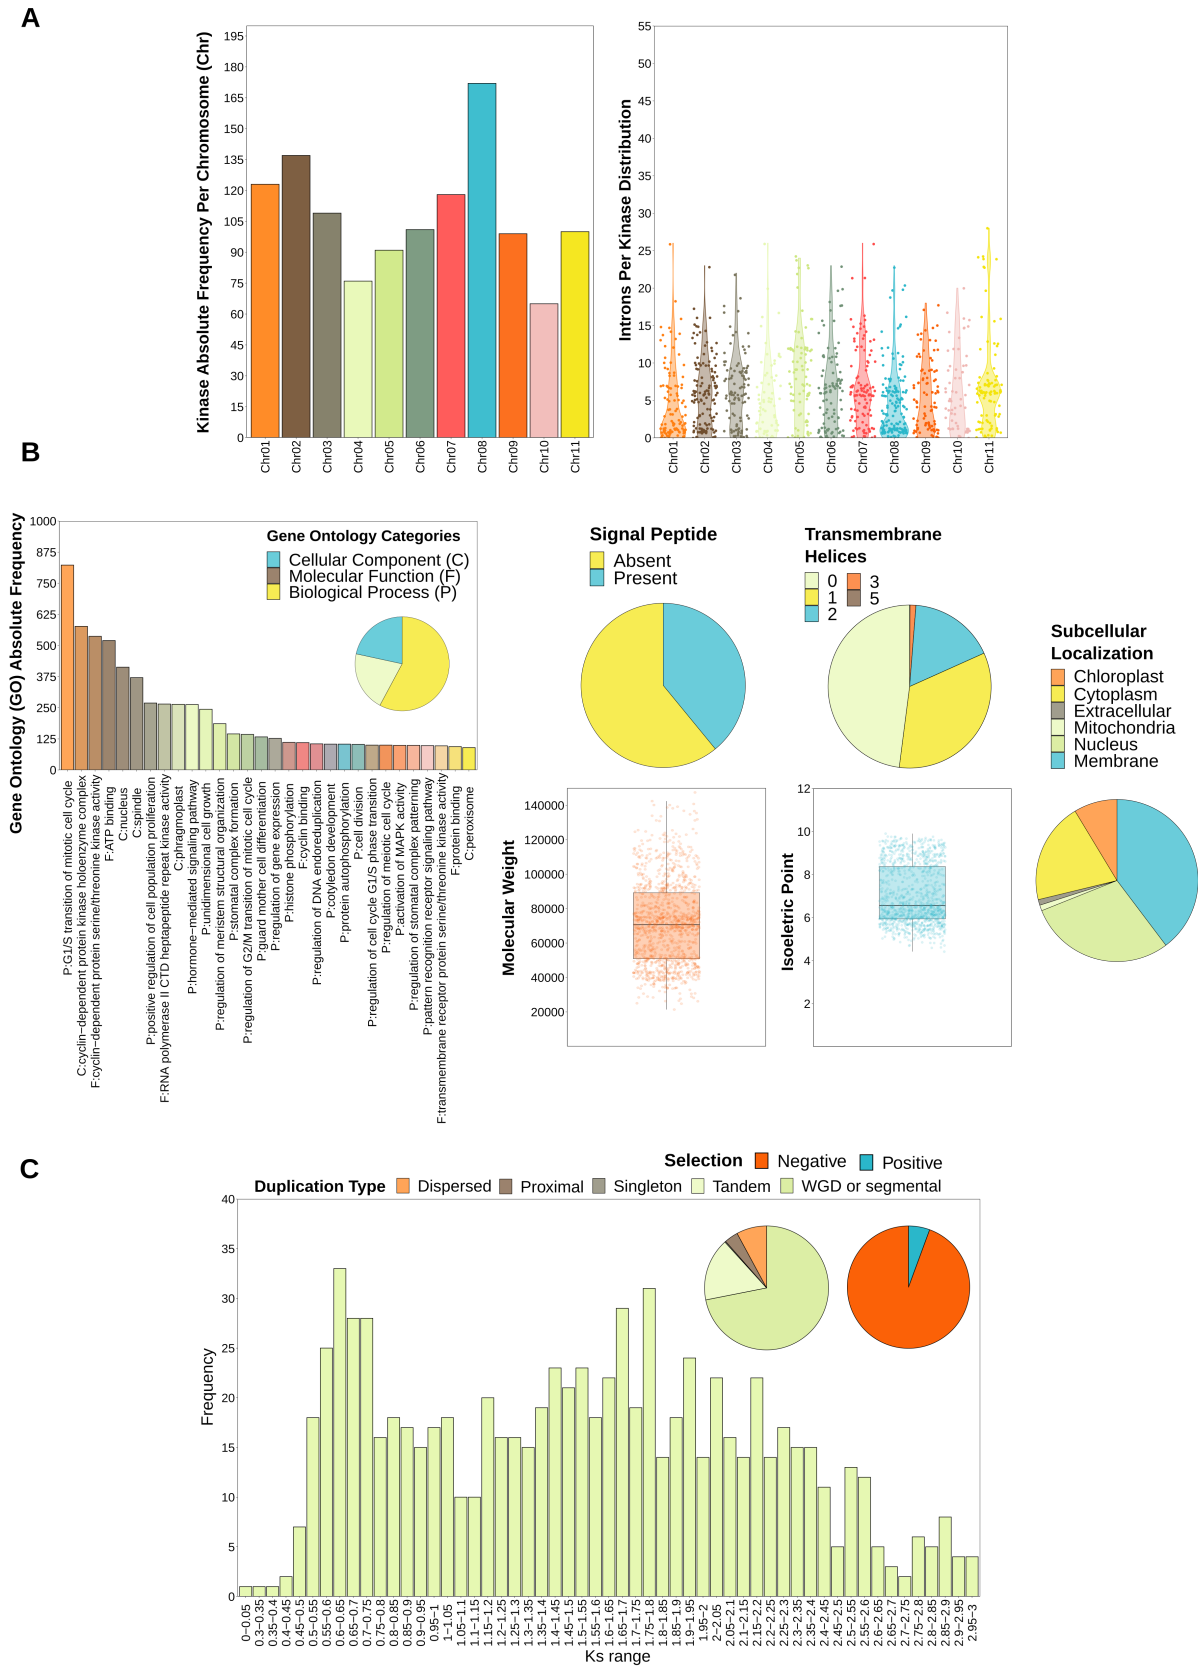

**Fig. 1.** Descriptive analysis of kinase characteristics in *Phaseolus vulgaris*: (A) chromosomal distribution and intron occurrence; (B) presence of signal peptides and transmembrane helices, and distribution of molecular weights, isoelectric points (pIs), Gene Ontology (GO) terms, and subcellular localizations; and (C) duplication events.

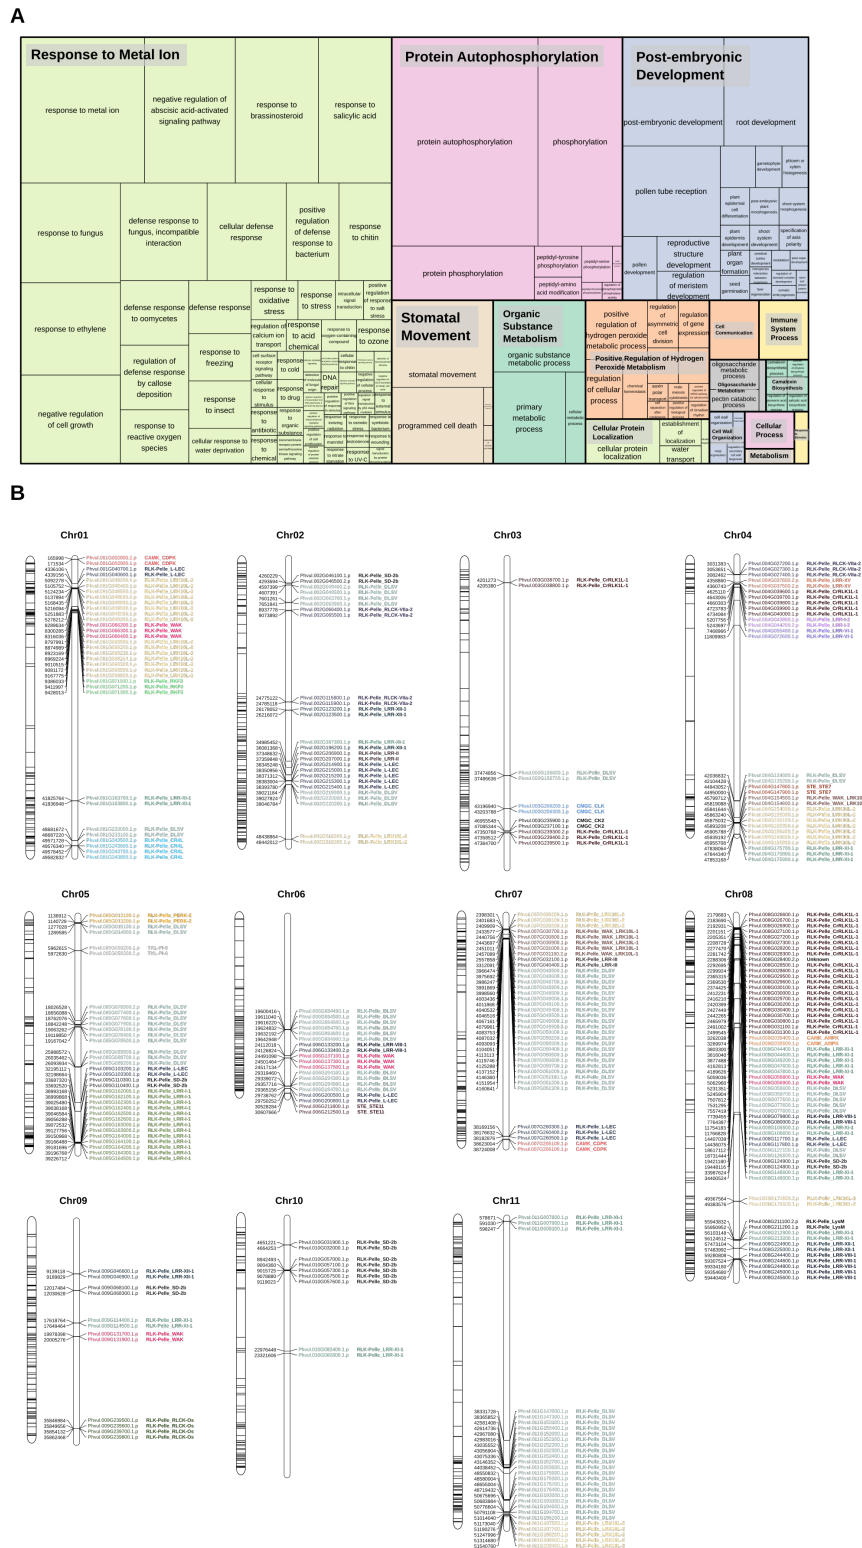

**Fig. 2.** (A) Gene Ontology (GO) categories (biological processes) related to tandemly duplicated kinases. The size of the subdivisions within the blocks represents the abundance of that category in this set of kinases. The colors are related to the similarity to a representative GO annotation for the group. (B) Kinase distribution along chromosomes. For each chromosome, all genes with kinase domains are indicated on the left, and only the tandemly organized kinases are indicated on the right, colored and labeled according to the subfamily classification.

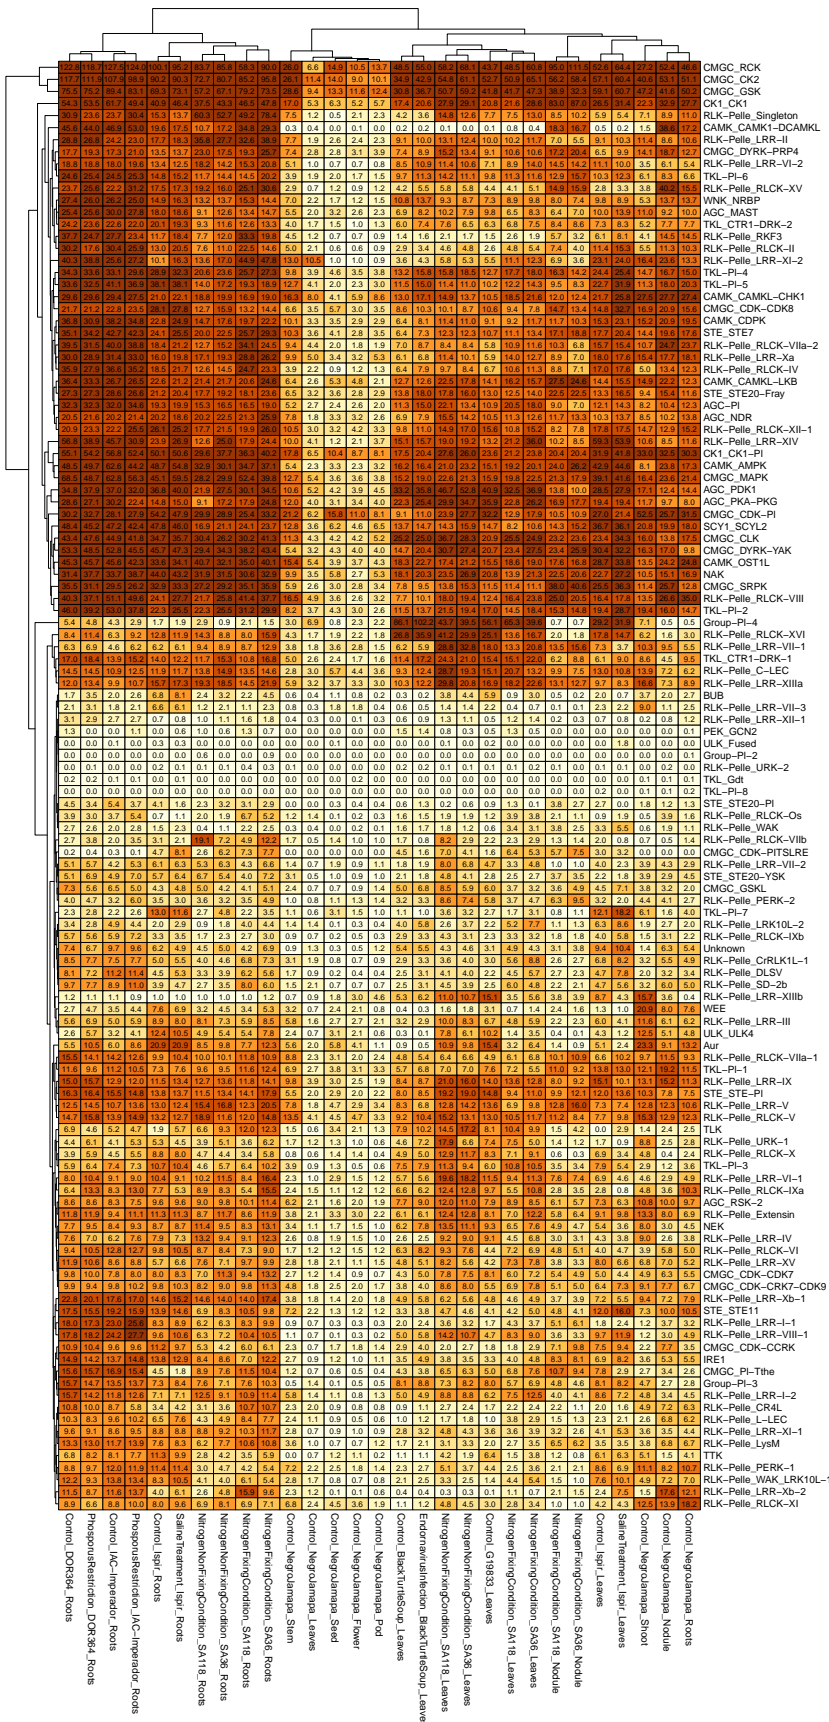

**Fig. 3.** RNA expression profiles of *Phaseolus vulgaris* kinases, shown on a heatmap indicating the average sample values of different combinations of genotypes and tissues (columns) and considering the organization of kinase subfamilies (rows).

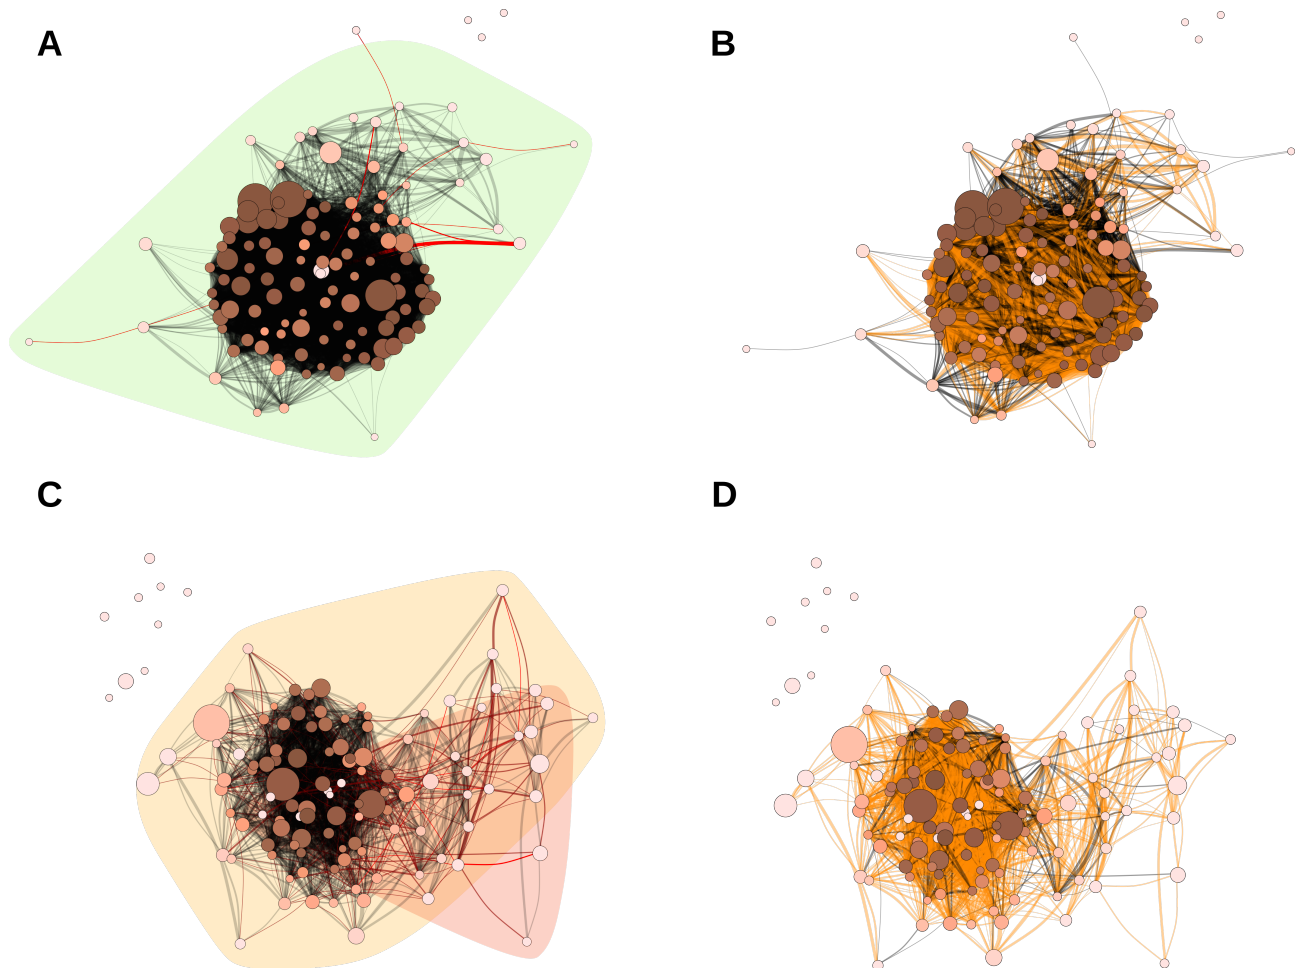

**Fig. 4.** Coexpression networks for *Phaseolus vulgaris* (Phvul) kinase subfamilies. Each node corresponds to a different subfamily, its size corresponds to the average expression value for all kinases within the subfamily in different samples, and its color corresponds to the hub score and ranges from beige to dark brown. Each edge corresponds to a correlation with a Pearson correlation coefficient of at least 0.6. The correlation strength is represented by the edge's width and the edge betweenness score is represented by the color (ranging from black to red, with red representing the highest values). (A) Phvul network (control samples) with the background colored according to the community detection analysis. (C) Phvul network (stress submitted samples) with the background colored according to the community detection analysis. (B) Phvul network (control samples) indicating the similarities with the Phvul network (stress submitted samples) in orange. (D) Phvul network (stress submitted samples) indicating the similarities with the Phvul network (control samples) in orange.
